# 1 Multiple-Input Deep Convolutional Neural Network 2 Model for COVID-19 Forecasting in China

3 Chiou-Jye Huang <sup>1</sup>, Yung-Hsiang Chen <sup>2</sup>, Yuxuan Ma <sup>1</sup> and Ping-Huan Kuo <sup>3,\*</sup>

4 <sup>1</sup> School of Electrical Engineering and Automation, Jiangxi University of Science and Technology, Ganzhou,  
5 Jiangxi, 341000, China; cjhuang@jxust.edu.cn; 1103552453@qq.com

6 <sup>2</sup> Department of Mechanical Engineering, National Pingtung University of Science and Technology, Pingtung  
7 91201, Taiwan; yhchen@mail.npust.edu.tw

8 <sup>3</sup> Computer and Intelligent Robot Program for Bachelor Degree, National Pingtung University, Pingtung  
9 90004, Taiwan; phkuo@mail.nptu.edu.tw

10 \* Correspondence: phkuo@mail.nptu.edu.tw; Tel.: +886-87663800 ext. 32620

11

12 **Abstract:** COVID-19 is spreading all across the globe. Up until March 23, 2020, the confirmed cases in 173  
13 countries and regions of the globe had surpassed 346,000, and more than 14,700 deaths had resulted. The  
14 confirmed cases outside of China had also reached over 81,000, with over 3,200 deaths. In this study, a  
15 Convolutional Neural Network (CNN) was proposed to analyze and predict the number of confirmed cases.  
16 Several cities with the most confirmed cases in China were the focus of this study, and a COVID-19  
17 forecasting model, based on the CNN deep neural network method, was proposed. To compare the overall  
18 efficacies of different algorithms, the indicators of mean absolute error and root mean square error were  
19 applied in the experiment of this study. The experiment results indicated that compared with other deep  
20 learning methods, the CNN model proposed in this study has the greatest prediction efficacy. The feasibility  
21 and practicality of the model in predicting the cumulative number of COVID-19 confirmed cases were also  
22 verified in this study.

23 **Keywords:** Total confirmed forecasting; convolutional neural network; COVID-19

24

## 25 1. Introduction

26 In early December 2019, the first case of COVID-19 infection was discovered in Wuhan City in China's  
27 Hubei Province [1]. In the following weeks, this disease broke out within China and continued to spread  
28 extensively in other countries, causing worldwide panic. The pneumonia caused by this novel coronavirus was  
29 officially named the Coronavirus disease 2019 (COVID-19) by the World Health Organization (WHO). The  
30 2019 coronavirus epidemic was triggered by the Severe Acute Respiratory Syndrome Coronavirus 2 (SARS-  
31 CoV-2), and it has, at the time of writing, spread in over 173 countries, causing more than 15,000 deaths. The  
32 epidemic is still spreading, and the WHO has classified the global risk level of the disease as a "pandemic."  
33 Currently, the earliest known case symptoms appeared on December 1, 2019, and the first case sought treatment  
34 on December 8. On December 26, 2019, Wuhan City Respiratory and Intensive care doctor Zhang Jixian first  
35 discovered this pneumonia with unknown cause and suspected that it is an infectious disease. Subsequently, the  
36 disease broke out in Wuhan City. On January 20, 2020, Chinese academic Zhong Nanshan publicly announced  
37 that the novel coronavirus pneumonia "definitely transmits between people." On January 23, 2020, the Wuhan  
38 City Government announced the adoption of lockdown and quarantine measures in the infected areas, which  
39 was the first case of lockdown in a major city (with a population of 11 million) in recent public health history.  
40 Since January 13, the disease continued to spread to Thailand, Japan, and South Korea. On January 30, three  
41 countries outside China were verified as having interpersonal propagation, and the pandemic was thus  
42 designated as an international public health emergency event by the WHO.

43 According to reports on the epidemic, "the propagation speed is faster, and the virus propagation power  
44 has increased." Infected people can infect others with the virus while exhibiting no symptoms; and the latency  
45 from infection to the presentation of symptoms is as long as 14 days. These characteristics also increase the  
46 difficulty of controlling the epidemic. As the epidemic continues, there is also a problem of the global  
47 undersupply of surgical masks. Currently, no vaccine and remedy for the novel coronavirus have been  
48 discovered. WHO assistant director-general Bruce Aylward stated that Remdesivir is currently the only drug

49 that is “considered to probably have real efficacy.” The China–Japan Friendship Hospital in China and the  
50 American National Institute of Allergy and Infectious Diseases are starting to conduct clinical trials for the drug.  
51 At present, no sufficient knowledge regarding the disease is known, and key factors, such as virus source, virus  
52 birthplace, morbid mechanism, virus pathogenicity, and propagation power are still uncertain. The WHO stated  
53 on March 3 that with the novel coronavirus epidemic, the world is in an “unknown state.”

54 Up until March 23, 2020, 345,297 people have been infected with the virus; among these people, 14,765  
55 have died. The several European countries with the most severe epidemics have experienced the maximum  
56 increase in confirmed cases in a single day on March 5: cases for Italy increased from 3,089 to 3,858, those for  
57 Germany increased from 262 to 482, those for France increased from 285 to 423, and those for the Netherlands  
58 increased more than twofold from 38 to 82. In the WHO report on February 26, the numbers of new cases in  
59 China and Japan have decreased, but the numbers of new cases in Italy, Iran, and South Korea are still rising.  
60 At the time of writing, the numbers of confirmed cases in Germany, France, and Spain have surpassed 1,000.

## 61 2. Related Works

62 Fig. 1 [2] presents the global map of COVID-19 occurrence according to data from the United States’  
63 Centers for Disease Control and Prevention. The countries marked with a color are countries with confirmed  
64 cases. At present, 173 of the 195 countries in the world have confirmed cases, underscoring the epidemic’s  
65 astounding speed of propagation from its origin in China’s Hubei province. Most scholars have used  
66 mathematical models to predict the spread of COVID-19. Roosa et al. [3] used the generalized logistic model,  
67 the Richards model, and the sub-epidemic model to establish prediction models for the cumulative numbers of  
68 confirmed cases in Guangdong Province and Zhejiang Province. They predicted that, in the next 5 days and 10  
69 days from their time of writing, 65–81 and 44–354 new cases will appear in Guangdong and Zhejiang provinces,  
70 respectively. In addition, Liu et al. [4] used mathematical models to simulate the propagation status of COVID-  
71 19 in China and noted the importance of the government’s policy of limiting public activities and the movement  
72 of infected people with no symptoms. Boldog et al. [5] adopted a Time-Dependent Compartmental Model of  
73 the Transmission Dynamics to estimate the cumulative number of confirmed cases outside of Hubei Province.  
74 Moreover, the Galton–Watson branch was used to analogize virus propagation, thus determining the  
75 connectivity and transmissibility between China and the destination country. The disadvantage of this method  
76 is that the uncertainty regarding the efficacy of control measures against the disease results in difficulties in  
77 predicting the development trajectories of the disease. By comparison, Al-Qaness et al. [6] adopted the adaptive  
78 neuro-fuzzy inference system (ANFIS), an improvement from flower pollination algorithm and salp swarm  
79 algorithm, to predict the number of confirmed cases in the next 10 days. The comparison with the ANFIS  
80 optimized with GA, PSO, ABC, and FPA indicated that the accuracy of the FPASSA-ANFIS model reached  
81 0.97, and the predicted average increase in numbers of new cases in the next 10 days was 10% more than the  
82 number of present cases. Jung et al. [7] used the rate of increase together with delayed distribution estimation  
83 and statistical induction to establish a mathematical model, based on COVID-2019 case data reported before  
84 January 24. The predicted cumulative number of confirmed cases for up until January 24 was 6,924, and the  
85 predicted death ratio was 5.3%; these figures were within the 95% confidence interval. Compared with previous  
86 methods for establishing mathematical models, Fan et al. [8] adopted a statistical method for predicting the  
87 floating population in Wuhan City. The experiment indicated that the floating population in Wuhan region is  
88 highly correlated with the number of daily confirmed cases. The residence time of the floating population for  
89 local cases was longer than that for non-local cases, which results in a lower predicted number of confirmed  
90 cases in the areas around Hubei Province. The prediction results indicate that approximately 80% of the  
91 epidemic will be centralized in the top 30 districts.

92 However, applications of deep learning methods have mainly used the genome of the 2019-cCoV virus to  
93 predict disease propagation. Yang et al. [9] used the Susceptible-Exposed-Infectious-Removed model to  
94 integrate the epidemic curve, combining it with the long short-term memory model. The maximum value was  
95 reached on February 28, and the curve gradually lowered in late April. Hu et al. [10] used an improved stacked  
96 autoencoder and a cluster algorithm to group the instantaneous confirmed cases in every province; they noted  
97 a high accuracy in AI-based methods for COVID-19 trajectory prediction. The epidemic was predicted to end  
98 in mid-April. Guo et al. [11] used deep learning–based virus host prediction to compare the gene sequence of  
99 2019-nCoVs with those of Severe Acute Respiratory Syndrome Coronavirus (SARS-CoV), bat SARS corona  
100 virus, and Middle East respiratory syndrome–related coronavirus (MERS-CoV). The bat SARS coronavirus  
101 was discovered to have a more similar mode of infection to COVID-19. Metsky et al. [12] used a nucleic acid

102 test based on clustered regularly interspaced short palindromic repeats (CRISPR) genome editing and selected  
103 67 viruses and subspecies as well as subspecies that are highly similar to 2019-nCoV. Thus, 67 test methods  
104 were designed in the ADAPT system to increase the sensitivity and speed of virus detection.

105 Riou et al. [13] simulated the early outbreak trajectories of 2019-nCoV and noted that the basic  
106 reproduction number  $R$  of 2019-nCoV was approximately 2.2 (90% high density interval 1.4–3.8) and that  
107 2019-nCoV has the potential for continual infection between people. Liu et al. [14] compared 2019-nCoV with  
108 SARS and estimated the doubling time of 2019-nCoV and SARS as well as the basic reproduction number  $r_0$   
109 and time-varying instantaneous reproduction number  $r_t$  through data analysis. They discovered that the  
110 infectivity of 2019-nCoV may be stronger than SARS, but that disease control efforts are effective. Ming et al.  
111 [15] adopted an improved version of the Susceptible-Infectious-Recovered (SIR) model to predict the actual  
112 number of infection cases of 2019-nCoV as well as the actual load on the intensive care units under different  
113 diagnosis rates and public health intervention efficacies. They discovered that under a 50% diagnosis rate and  
114 no public health intervention, the actual number of cases will be significantly higher than the reported number,  
115 whereas under a 70% public health intervention, the load on the health system will decrease substantially. Zhao  
116 et al. [16] used a probability prediction model to accurately predict the infection nodes from snapshots of  
117 spreading. Fountain-Jones et al. [17] used machine learning to establish pathogen-risk models and compared  
118 the prediction results of different machine learning methods and explained the results by using game theory.

119 Benvenuto et al. [18] adopted an autoregressive integrated moving average model to predict the epidemic  
120 trend and morbidity of 2019-nCoV with a 95% confidence interval. They discovered that if the virus does not  
121 mutate, the case number will reach a plateau. Li et al. [19] used a function to separately describe the daily  
122 infection and death data of 2019-nCoV in Hubei and outside Hubei. The author thought that the inflection point  
123 in the Hubei region was at February 6, 2020, and that the epidemic will end on March 10, 2020, with an  
124 estimated infection rate of 39,000 people. However, the data did not include the data after February 12, where  
125 such inclusion will increase the predicted figures by 1.4 times. Yang et al. [9] described the clinical  
126 characteristics and imaging manifestation of the infected cases of COVID-19 that had been confirmed in the  
127 hospitals in Wenzhou area. In addition, the patients with and without travel or residence history in Hubei were  
128 compared. Tian et al. [20] analyzed the clinical and epidemiological characteristics of COVID-19 in the Beijing  
129 area. The characteristics of severe confirmed cases and common confirmed cases were compared, and the  
130 characteristics of COVID-19 and SARS were compared as well. Chen et al. [21] analyzed some cases of  
131 pregnant women with COVID-19 and noted no evidence that COVID-19 causes intrauterine infection through  
132 vertical transmission among women in late pregnancy. The major contribution of that study is its fast  
133 establishment of a prediction model by using deep learning with a small dataset, making it an important  
134 reference for other countries in their containment of the COVID-19 epidemic.

135 The structure of this study proceeds as follows. The first section introduces the entire study. The second  
136 section is a literature review. The following third section details this study's proposed deep neural network  
137 algorithm. The fourth section presents and discusses the experiment results in detail. Finally, the fifth section  
138 concludes the entire study and underscores the contribution of this study and the predicted trend of the COVID-  
139 19 epidemic.

140

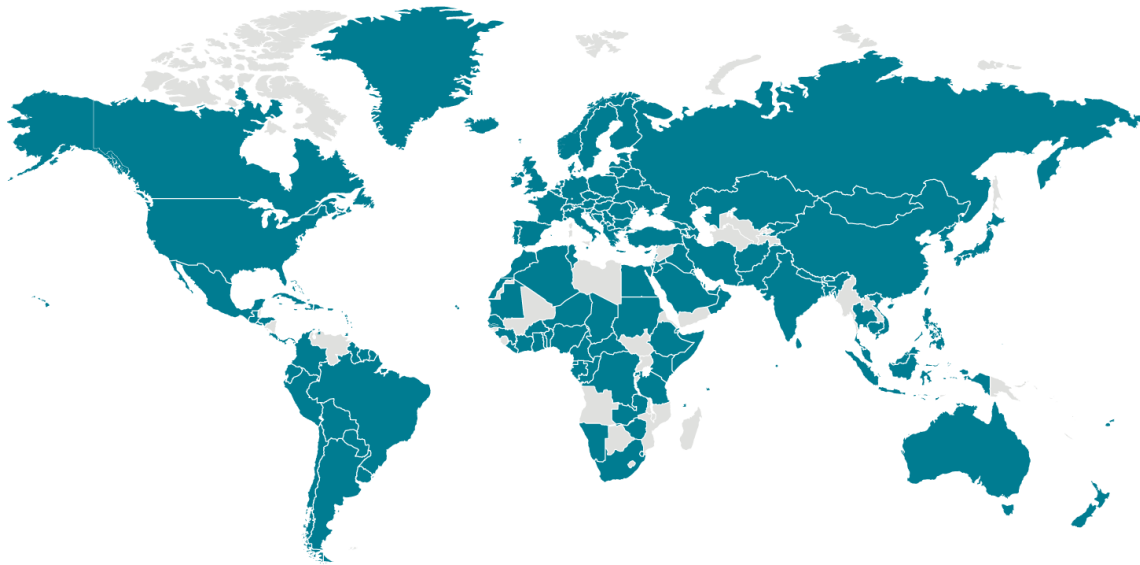

141

142 **Fig. 1.** Global Map of Confirmed COVID-19 Cases as of 12:00 a.m. ET, March 21, 2020 [2].

### 143 **3. Artificial neural networks: A background**

144 An Artificial Neural Network (ANN) [22, 23] is a mathematical model that mimics how neurons operate  
145 in organisms. It is a very powerful tool for establishing nonlinear models. An early ANN structure is the  
146 Multilayer Perceptron (MLP), which uses the neural network of fully connected structures; it has decent efficacy  
147 and numerous applications. However, if the data is too complex, simply using the MLP structure may cause the  
148 model to be unable to effectively learn how to handle every situation. At present, ANN has already developed  
149 into various new structures. The main structure of this study is the Convolutional Neural Network (CNN) [24,  
150 25], and three other neural network structures are compared with it. These four neural network structures are  
151 detailed in the following subsections.

#### 152 *3.1. Convolutional neural network*

153 The 1D convolution operation [26] is illustrated in Fig. 2. The difference between CNN and MLP is that  
154 CNN uses the concept of weight sharing. As illustrated in Fig. 2, the advantage of CNN is that its weight number  
155 does not have to be as large as that for a fully connected structure. Consequently, the training is relatively easier,  
156 and important characteristics are extracted more effectively. CNN is a feedforward neural network, which is an  
157 improvement from MLP. CNN contains four levels in structure: an input layer, convolutional layer, pooling  
158 layer, and fully connected layer.

159 The deep CNN structure proposed in this study is illustrated in Fig. 2, and the structure is composed of  
160 CNN and the dropout layer. The input layer structure is constituted by six time sequences composed of factors  
161 influencing the cumulative number of cases. The convolutional layer structure is divided into four layers, and  
162 each convolution layer has 16, 32, 32, and 64 convolutional kernels. Going through every convolutional layer,  
163 the convolutional kernels of the previous layer slide in the input data matrixes. The convolution process can be  
164 expressed in Equation (1), in which  $X_{ij}$  is the  $i$ th and  $j$ th matrix in the row and column direction, respectively,  
165 corresponding to the convolution kernels in the input matrix through smooth shifting.  $K$  is the convolution  
166 kernel, and  $\gamma$  is the output matrix.

$$167 \gamma(i, j) = X_{ij} * K \quad (1)$$

168 The structure principle of the fully connected layer can be expressed by Equation (2):

$$169 \mathbf{o} = f(\mathbf{w}_f^T \mathbf{x} + \mathbf{b}) \quad (2)$$

170 In (2),  $\mathbf{o}$  is the vector composed of output values,  $\mathbf{x}$  is the vector composed of input values,  $\mathbf{w}_f^T$  is the  
171 vector composed of weight values,  $\mathbf{b}$  is the vector composed of threshold values, and  $f$  is the activation  
172 function. The output of the convolution layer can yield a 1D vector through Flatten expansion. Subsequently,  
173 the vectors are connected to the fully connected layer (dense) to obtain a 1D output. At the time of writing, the

174 COVID-19 epidemic has continued for only 3 months, 1 week, and 3 days. Thus, considering the small number  
 175 of obtained samples, this model prevents overfitting by introducing the method of dropout regularization.

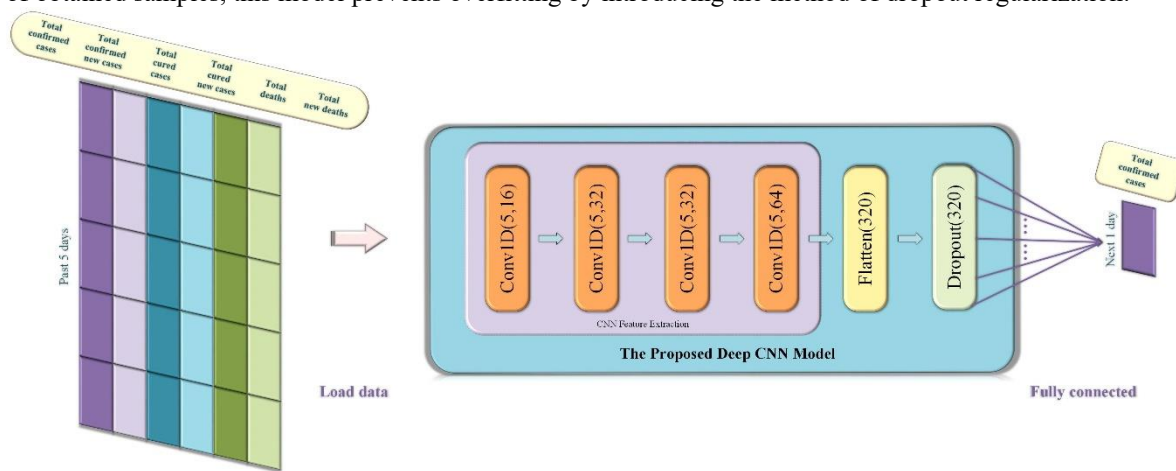

176  
 177

**Fig. 2.** Structure of the proposed deep CNN model.

178 **3.2. Multilayer perceptron**

179 A MLP is an ANN model that includes the input layer, hidden layer, and output layer. The structure of the  
 180 ANN is illustrated in Fig. 3. Different connection layers are all fully connected, and the principle is similar to  
 181 that of MLP. Each neural unit is connected with a weight coefficient ( $w_i$ ), and the combination of transmission  
 182 result  $w_i x_i$  and the deviation  $b_i$  is calculated using Equation (3). In addition, current neural unit output results  
 183 are obtained through the activation function  $f$ .

$$184 \quad y_i = f(w_i x_i + b_i) \quad (3)$$

185 The structure of the proposed deep MLP is illustrated in Fig. 3. The structure is composed of two levels of  
 186 MLP, and each MLP layer has 16 neural units. The input structure is constituted by six factors influencing the  
 187 cumulative number of cases, with the time step of 5. Through a Flatten expansion, a  $1 \times 30$  vector is derived,  
 188 and the output is obtained after connecting the vector to the fully connected layer (dense).

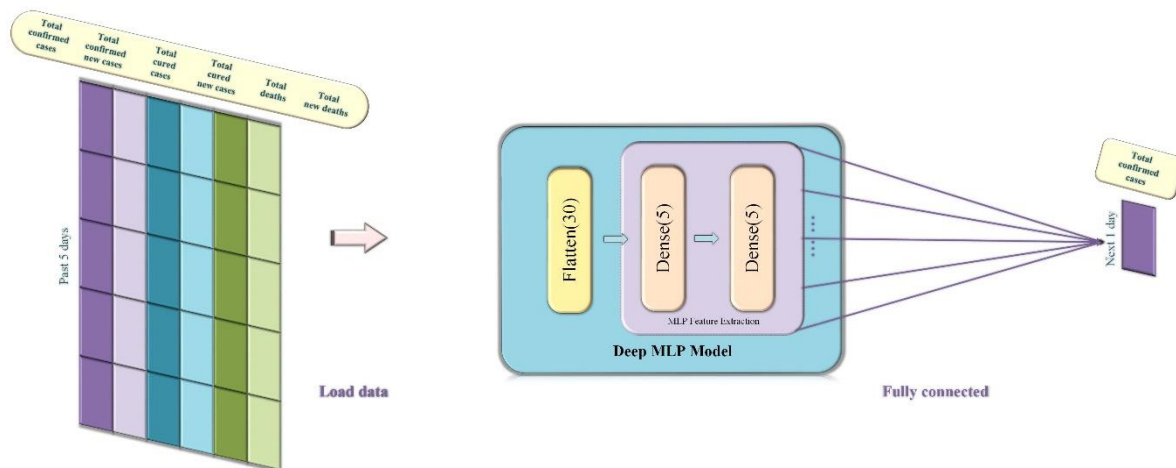

189  
 190

**Fig. 3.** Structure of the comparative deep neural network MLP adopted in this study.

191 **3.3. Long short-term memory neural network**

192 The long short-term memory model (LSTM) [27, 28] is an improvement from the recurrent neural network.  
 193 The difference between the RNN and LSTM is that for LSTM, a cell state is added to store long-term states. In  
 194 the neural unit model structure in Fig. 4 (a), the internal structure of LSTM can be divided into the input gate,  
 195 forget gate, and output gate. The principle of the LSTM input gate is expressed in the following formulae.

196 Equation (4) is used to decide which piece of information is to be added by passing  $h_{t-1}$  and  $x_t$  through the  
 197 sigmoid layer. Subsequently, Equation (5) is used to pass  $h_{t-1}$  and  $x_t$  through the tanh layer to obtain new  
 198 information  $\tilde{C}_t$ . Equation (6) is used to combine the information of the current moment  $\tilde{C}_t$  and long-term  
 199 memory  $C_{t-1}$  into a new memory state  $C_t$ .

$$200 \quad i_t = \sigma(W_i \cdot [h_{t-1}, x_t] + b_i) \quad (4)$$

$$201 \quad \tilde{C}_t = \tanh(W_c \cdot [h_{t-1}, x_t] + b_c) \quad (5)$$

$$202 \quad C_t = f_t C_{t-1} + i_t \tilde{C}_t \quad (6)$$

203 The forget gate of the LSTM uses a sigmoid layer and a dot product to allow information to pass through  
 204 selectively. Equation (7) allows the LSTM to decide whether to forget the related information of the previous  
 205 cell, at a certain probability, in which  $W_f$  is the weight matrix, and  $b_f$  is the offset term.

$$206 \quad f_t = \sigma(W_f \cdot [h_{t-1}, x_t] + b_f) \quad (7)$$

207 The output gate of LSTM decides which states are required to be maintained by the input  $h_{t-1}$  and  $x_t$   
 208 according to Equations (8) and (9). The final output results are obtained by passing the new information  $C_t$   
 209 through the tanh layer to multiply with state judgement vectors.

$$210 \quad O_t = \sigma(W_o \cdot [h_{t-1}, x_t] + b_o) \quad (8)$$

$$211 \quad h_t = O_t \tanh(C_t) \quad (9)$$

212 The deep LSTM structure proposed in this study is illustrated in Fig. 4 (b). The structure is composed of  
 213 two LSTM layers, and each layer has 16 neural units. The input structure is constituted by six factors influencing  
 214 the cumulative number of cases, with a time step of 5. A 1D output is obtained through the fully connected  
 215 layer.

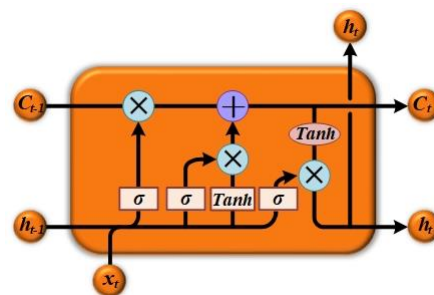

(a)

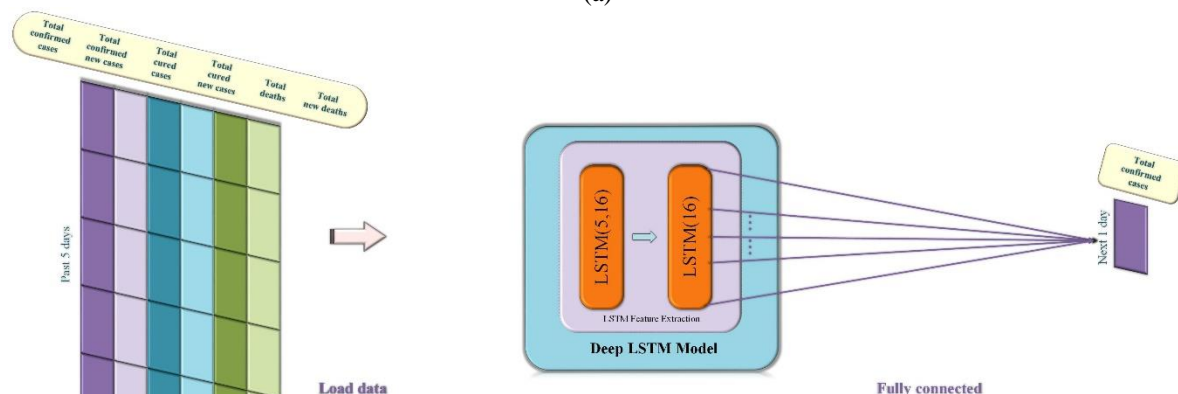

(b)

220 **Fig. 4.** Structure of the comparative deep neural network LSTM adopted in this study. (a) LSTM neural unit; (b) the  
 221 deep neural network LSTM model with an input layer consisting six input signals.

### 222 3.4. Gate recurrent unit

223 The Gate Recurrent Unit (GRU) [29, 30] is a variation of the LSTM, as illustrated in Fig. 5 (a). GRU  
 224 changes the input gate and forget gate of LSTM into the update gate. GRU retains the effect of LSTM and  
 225 simplifies the internal structure of GRU model units. The principle of GRU's update gate is described in  
 226 Equation (10). Specifically, the neural unit information of the previous moment  $h_{t-1}$  and the input data of the

227 current moment  $x_t$  are combined and input to the sigmoid layer to obtain the update information of the current  
 228 moment  $z_t$ .  $W$  is the weight matrix.

229 
$$z_t = \sigma(W_z \cdot [h_{t-1}, x_t]) \quad (10)$$

230 The principle of the GRU reset gate is described in Equation (11). The reset information  $r_t$  is reserved  
 231 after  $h_{t-1}$  and  $x_t$  are separately combined with the weight matrix.

232 
$$r_t = \sigma(W_r \cdot [h_{t-1}, x_t]) \quad (11)$$

233 The input information of the current moment  $x_t$  is maintained with the obtained  $r_t$  at the weight  
 234 probability. The following Formula (12) is used to calculate the information of the current moment  $\tilde{h}_t$ .

235 
$$\tilde{h}_t = \tanh(W \cdot [r_t * h_{t-1}, x_t]) \quad (12)$$

236 Equation (13) combines the reserved long-term memory  $z_t$  and the information of the current moment  
 237  $\tilde{h}_t$  to obtain new information  $h_t$ .

238 
$$h_t = (1 - z_t) h_{t-1} + z_t \tilde{h}_t \quad (13)$$

239 The structure of the proposed deep GRU is shown in Fig. 5 (b). The structure is composed of two GRU  
 240 layers, and each layer has 16 neural units. The input structure is constituted by six factors influencing the  
 241 cumulative number of cases, with a time step of 5. A 1D output is obtained through the fully connected layer.

242  
 243

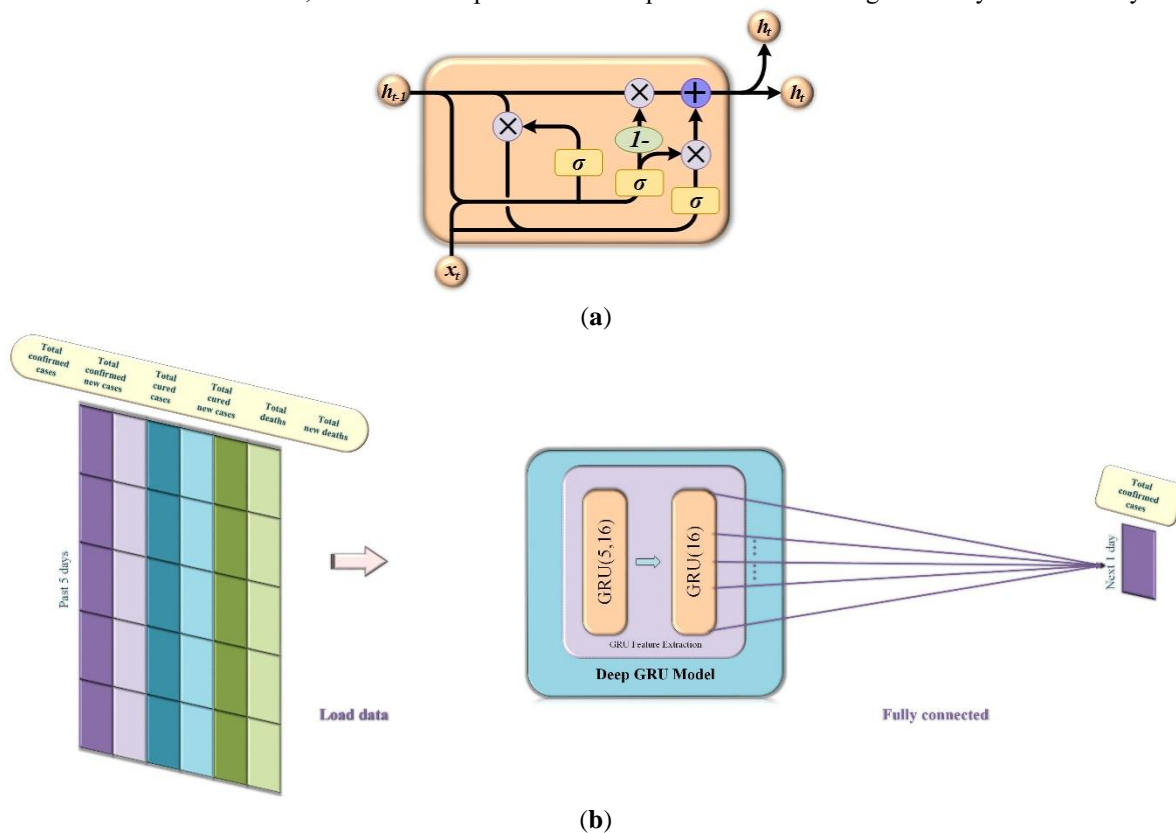

244  
 245  
 246

247 **Fig. 5.** Structure of the comparative deep neural network GRU adopted in this study. (a) GRU neural unit; (b)  
 248 the deep neural network GRU model with an input layer consisting six input signals.

249 The pseudocode of the proposed CNN is described in Algorithm 1. Specifically, the dataset and test set  
 250 are first loaded. The input data are then reconstructed into 3D matrixes, and the output data format is set to the  
 251 2D matrix. The CNN model is constructed, and related CNN parameters are set. Before the training starts, the  
 252 weighting value  $w$  is initialized, and the repeat operator  $a$  is initialized as 0. In the training process, the  
 253 training samples are trained in batches, and the loss function is calculated once per batch to update the weight  
 254 value  $w$ . After the training, the test set data are registered to the trained network. The errors are calculated, and  
 255 the actual values and error values are compared.

256

---

#### Algorithm 1 Convolutional Neural Network

---

Input, target, and hyperparameter setting:

Load the training set and testing set.

Reshape the input into the corresponding three-dimensional matrix.

1. The first dimension is the sample index.
2. The second dimension is the time step.
3. The third dimension is the characteristic.

Reshape the output into a two-dimensional matrix.

1. The first dimension is the sample target index.
2. The second dimension is the sample target.

Set relevant parameters of the CNN model.

Training:

Initialize the weight  $w$

$s \rightarrow$  Total number of training set samples

$c \rightarrow$  Batch size

$a \rightarrow 0$

for  $i$  to epoch then

for  $k$  to  $s$  then

$j = k \bmod c$

if  $j = 0$  then

$j = c$

end

if  $j - a > 0$  then

Calculate the output using Equations (1) and (2) for training set samples in the batch.

else

Calculate the loss using loss function, update the weight using optimizer, and calculate the output using Equations (1) and (2) for training set samples in the next batch.

end

$a = j$

end

end

Testing:

The established CNN model is used to predict the testing set. The real value is compared with the predicted value, and the prediction error is calculated.

---

## 257 4. Experimental Results and Discussion

258 Data on confirmed cases of COVID-19 from January 23, 2020 to March 2, 2020, and from January  
259 23, 2020 to March 2, 2020, were obtained from Surging News Network (a media outlet) [9] and WHO  
260 [31], respectively. In this experiment, the two evaluation indexes of the mean absolute error (MAE) and root  
261 mean square error (RMSE) were used; their formulae are presented in Equations (14) and (15). To conduct  
262 comprehensive efficacy tests, the dataset for January 23 to February 17 was chosen as the training data, and the  
263 dataset for February 18 to March 2 was used as testing data. Figs. 6 to 12 present the comparative prediction  
264 results of all the algorithms. The detailed MAE and RMSE values are listed in Tables I, II, III, and IV. The



265 experiment results indicated that the GRU has decent efficacy, and that CNN is the best performing algorithm  
 266 among its counterparts tested. The experiment demonstrated that the characteristic extraction of CNN is very  
 267 helpful for predicting the number of confirmed cases of COVID-19.  
 268

$$\text{MAE} = \frac{1}{N} \sum_{n=1}^N |y_n - \hat{y}_n| \quad (14)$$

$$\text{RMSE} = \sqrt{\frac{\sum_{n=1}^N (y_n - \hat{y}_n)^2}{N}} \quad (15)$$

269

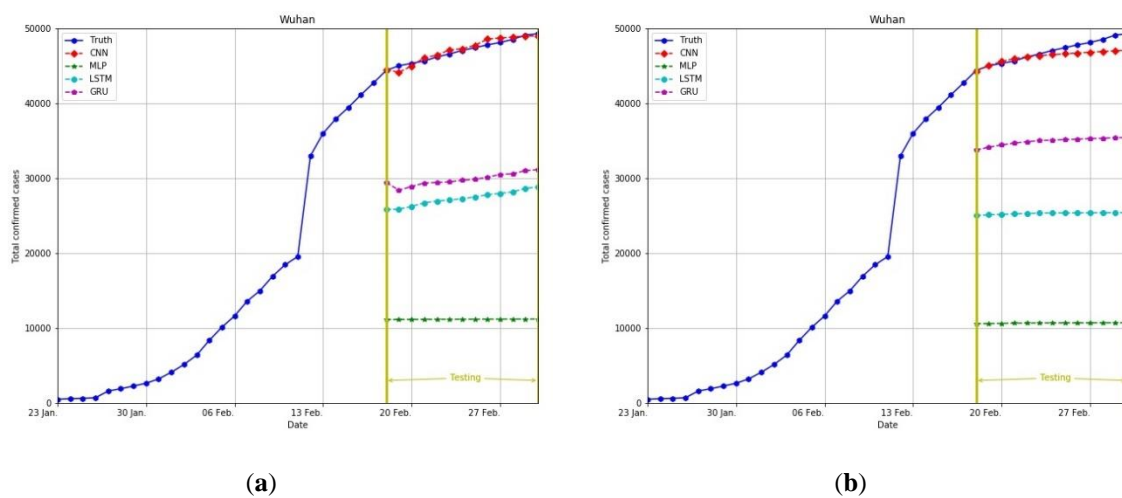

270 **Fig. 6.** Comparison of prediction results for the cumulative number of confirmed cases in Wuhan City, Hubei  
 271 Province, China. The comparison used the deep neural networks CNN, MLP, LSTM, and GRU. (a) Six  
 272 important factors were adopted as the input layer: new confirmed cases, new deceased cases, new cured cases,  
 273 cumulative confirmed cases, cumulative deceased cases, and cumulative cured cases. (b) Only one important  
 274 factor was adopted as the input layer: cumulative confirmed cases.

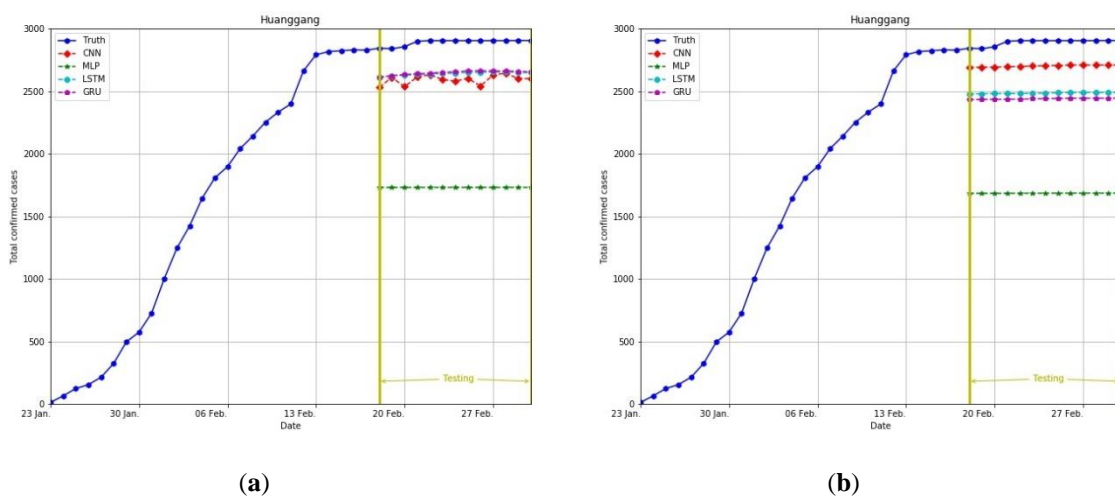

275 **Fig. 7.** Comparison of prediction results for the cumulative number of confirmed cases in Huanggang City,  
 276 Hubei Province, China. The comparison used the deep neural networks CNN, MLP, LSTM, and GRU. (a) Six  
 277 important factors were adopted as the input layer: new confirmed cases, new deceased cases, new cured cases,  
 278 cumulative confirmed cases, cumulative deceased cases, and cumulative cured cases. (b) Only one important  
 279 factor was adopted as the input layer: cumulative confirmed cases.

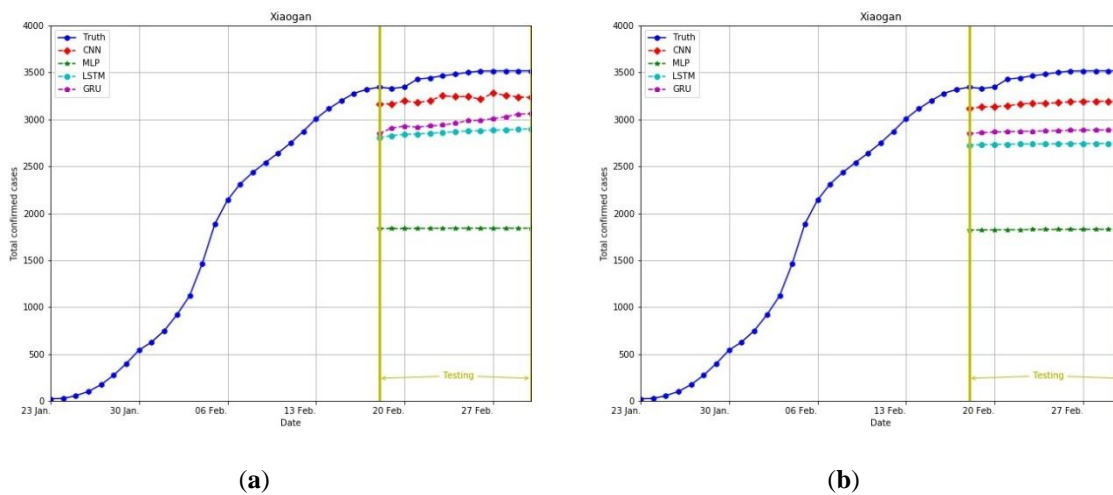

280  
281  
282  
283  
284

**Fig. 8.** Comparison of prediction results for the cumulative number of confirmed cases in Xiaogan City, Hubei Province, China. The comparison used the deep neural networks CNN, MLP, LSTM, and GRU. (a) Six important factors were adopted as the input layer: new confirmed cases, new deceased cases, new cured cases, cumulative confirmed cases, cumulative deceased cases, and cumulative cured cases. (b) Only one important factor was adopted as the input layer: cumulative confirmed cases.

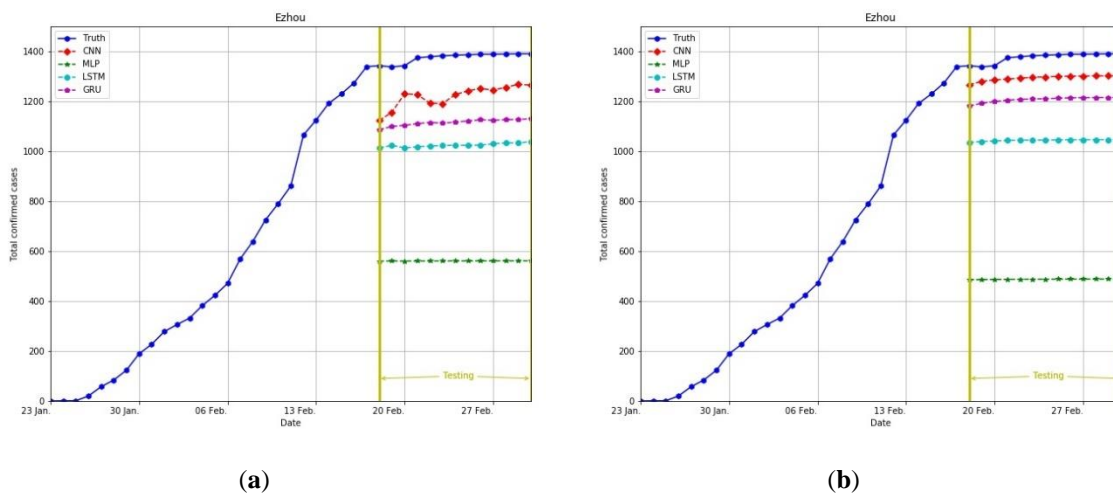

285  
286  
287  
288  
289

**Fig. 9.** Comparison of prediction results for the cumulative number of confirmed cases in Ezhou City, Hubei Province, China. The comparison used the deep neural networks CNN, MLP, LSTM, and GRU. (a) Six important factors were adopted as the input layer: new confirmed cases, new deceased cases, new cured cases, cumulative confirmed cases, cumulative deceased cases, and cumulative cured cases. (b) Only one important factor was adopted as the input layer: cumulative confirmed cases.

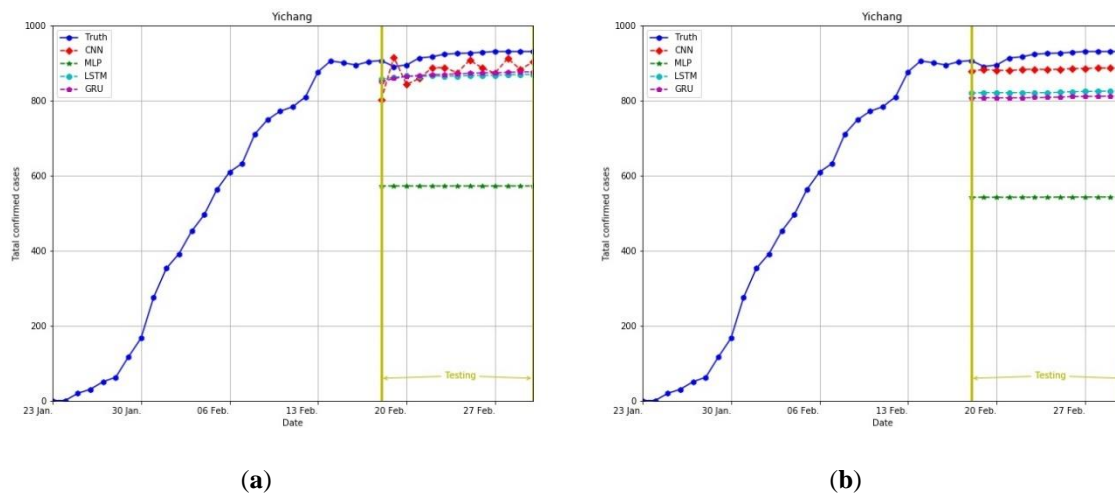

290  
291  
292  
293  
294

**Fig. 10.** Comparison of prediction results for the cumulative number of confirmed cases in Yichang City, Hubei Province, China. The comparison used the deep neural networks CNN, MLP, LSTM, and GRU. (a) Six important factors were adopted as the input layer: new confirmed cases, new deceased cases, new cured cases, cumulative confirmed cases, cumulative deceased cases, and cumulative cured cases. (b) Only one important factor was adopted as the input layer: cumulative confirmed cases.

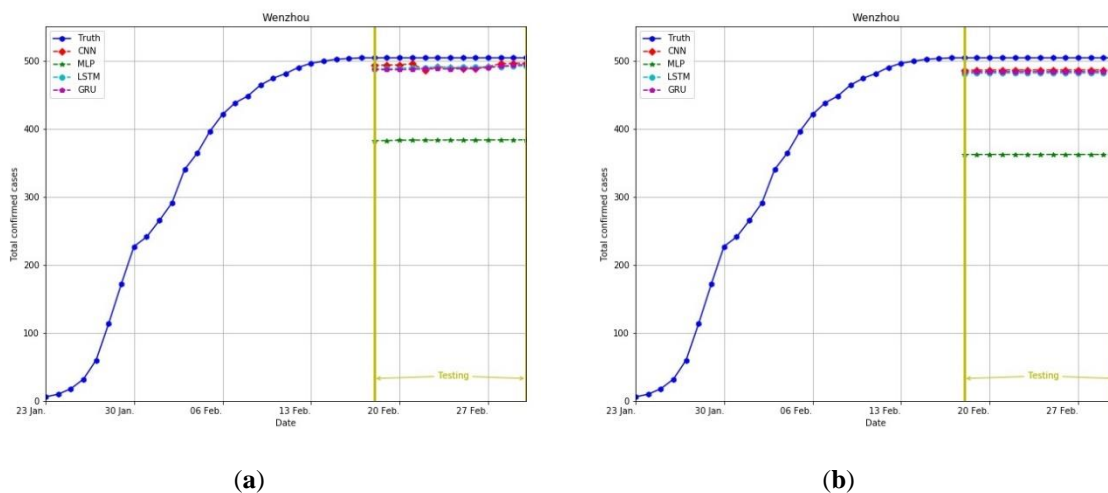

295  
296  
297  
298  
299

**Fig. 11.** Comparison of prediction results for the cumulative number of confirmed cases in Wenzhou City, Zhejiang Province, China. The comparison used the deep neural networks CNN, MLP, LSTM, and GRU. (a) Six important factors were adopted as the input layer: new confirmed cases, new deceased cases, new cured cases, cumulative confirmed cases, cumulative deceased cases, and cumulative cured cases. (b) Only one important factor was adopted as the input layer: cumulative confirmed cases.

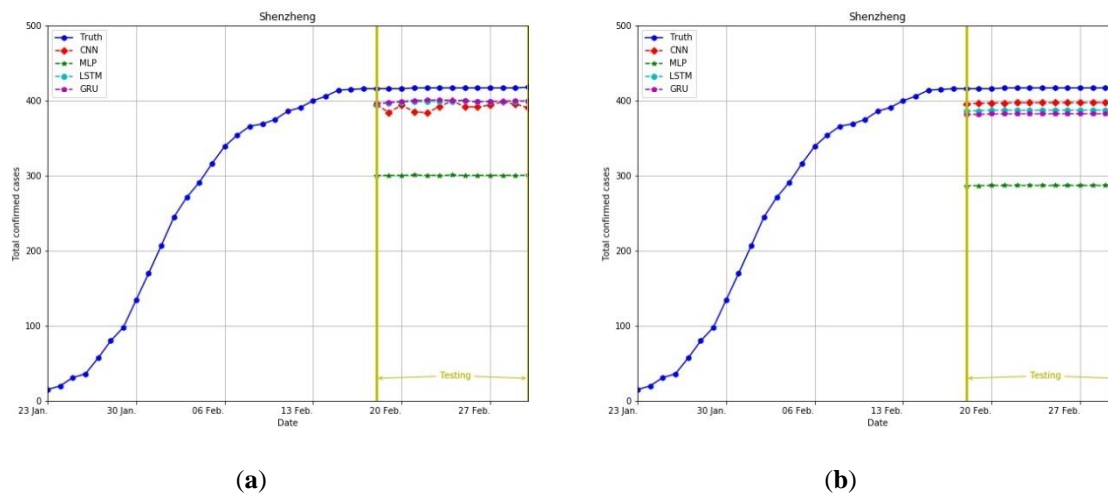

300 **Fig. 12.** Comparison of prediction results for the cumulative number of confirmed cases in Shenzhen City,  
 301 Guangdong Province, China. The comparison used the deep neural networks CNN, MLP, LSTM, and GRU. (a)  
 302 Six important factors were adopted as the input layer: new confirmed cases, new deceased cases, new cured  
 303 cases, cumulative confirmed cases, cumulative deceased cases, and cumulative cured cases. (b) Only one  
 304 important factor was adopted as the input layer: cumulative confirmed cases.

305 **TABLE I**  
 306 **EXPERIMENTAL RESULTS IN TERMS OF MEAN ABSOLUTE ERROR OF THE INPUT LAYER OF SIX NEURONS**

| City             | GRU       | LSTM      | MLP       | CNN            |
|------------------|-----------|-----------|-----------|----------------|
| <b>Wuhan</b>     | 17119.101 | 19671.849 | 35797.372 | <b>426.179</b> |
| <b>Huanggang</b> | 243.399   | 250.142   | 1159.923  | <b>89.026</b>  |
| <b>Xiaogan</b>   | 489.004   | 592.220   | 1616.017  | <b>87.343</b>  |
| <b>Ezhou</b>     | 259.843   | 350.798   | 814.801   | <b>77.942</b>  |
| <b>Yichang</b>   | 50.219    | 53.632    | 346.853   | <b>31.688</b>  |
| <b>Wenzhou</b>   | 15.067    | 13.988    | 120.844   | <b>4.617</b>   |
| <b>Shenzhen</b>  | 17.414    | 18.200    | 116.240   | <b>3.808</b>   |
| <b>Avg.</b>      | 2599.150  | 2992.976  | 5710.293  | <b>102.943</b> |

307 **TABLE II**  
 308 **EXPERIMENTAL RESULTS IN TERMS OF MEAN ABSOLUTE ERROR OF THE INPUT LAYER OF A SINGLE NEURON**

| City             | GRU           | LSTM      | MLP       | CNN             |
|------------------|---------------|-----------|-----------|-----------------|
| <b>Wuhan</b>     | 12054.218     | 21669.078 | 36307.670 | <b>1131.627</b> |
| <b>Huanggang</b> | 450.634       | 405.468   | 1206.190  | <b>255.561</b>  |
| <b>Xiaogan</b>   | 580.525       | 717.547   | 1629.771  | <b>389.392</b>  |
| <b>Ezhou</b>     | 168.118       | 331.491   | 887.933   | <b>102.507</b>  |
| <b>Yichang</b>   | 109.966       | 96.664    | 376.636   | <b>63.651</b>   |
| <b>Wenzhou</b>   | <b>20.417</b> | 22.303    | 141.863   | 22.138          |
| <b>Shenzhen</b>  | 34.452        | 29.589    | 129.942   | <b>27.136</b>   |
| <b>Avg.</b>      | 1916.904      | 3324.591  | 5811.429  | <b>284.573</b>  |

310 **TABLE III**  
 311

312 EXPERIMENTAL RESULTS IN TERMS OF ROOT MEAN SQUARE ERROR OF THE INPUT LAYER OF SIX NEURONS

| City             | GRU       | LSTM      | MLP       | CNN            |
|------------------|-----------|-----------|-----------|----------------|
| <b>Wuhan</b>     | 17140.879 | 19681.133 | 35829.022 | <b>456.910</b> |
| <b>Huanggang</b> | 243.715   | 250.594   | 1160.173  | <b>94.271</b>  |
| <b>Xiaogan</b>   | 490.381   | 593.989   | 1617.454  | <b>90.685</b>  |
| <b>Ezhou</b>     | 260.019   | 351.126   | 815.025   | <b>81.469</b>  |
| <b>Yichang</b>   | 50.960    | 54.844    | 347.112   | <b>32.855</b>  |
| <b>Wenzhou</b>   | 15.264    | 14.051    | 120.845   | <b>5.106</b>   |
| <b>Shenzhen</b>  | 17.446    | 18.217    | 116.241   | <b>4.779</b>   |
| <b>Avg.</b>      | 2602.666  | 2994.851  | 5715.125  | <b>109.439</b> |

313

314

315

TABLE IV

316

EXPERIMENTAL RESULTS IN TERMS OF ROOT MEAN SQUARE ERROR OF THE INPUT LAYER OF A SINGLE

317

NEURON

| City             | GRU       | LSTM      | MLP       | CNN             |
|------------------|-----------|-----------|-----------|-----------------|
| <b>Wuhan</b>     | 12101.919 | 21715.728 | 36338.153 | <b>1416.082</b> |
| <b>Huanggang</b> | 451.136   | 406.029   | 1206.424  | <b>256.246</b>  |
| <b>Xiaogan</b>   | 583.509   | 720.488   | 1631.175  | <b>391.768</b>  |
| <b>Ezhou</b>     | 168.461   | 331.896   | 888.127   | <b>102.974</b>  |
| <b>Yichang</b>   | 110.629   | 97.439    | 376.867   | <b>64.649</b>   |
| <b>Wenzhou</b>   | 20.417    | 22.303    | 141.863   | <b>22.139</b>   |
| <b>Shenzhen</b>  | 34.454    | 29.591    | 129.943   | <b>27.139</b>   |
| <b>Avg.</b>      | 1924.361  | 3331.925  | 5816.079  | <b>325.857</b>  |

318

Regarding the deep neural network prediction results for six and one-input factors, the MAE and RMSE values are listed in Tables 1 to 4. The MAE results from low to high are as follows: CNN (102.943, 284.573), GRU (2599.150, 1916.904), LSTM (2992.976, 3324.591), and MLP (5710.293, 5811.429). The RMSE results from low to high are as follows: CNN (109.439, 325.857), GRU (2602.666, 1924.361), LSTM (2994.851, 3331.925), and MLP (5715.125, 5816.079). The experiment results demonstrated that GRU and LSTM have decent efficacies and that CNN had the best performance. This experiment also demonstrated that the procedure of initial characteristic extraction through CNN and the subsequent input of characteristic values to the CNN structure greatly aid the prediction of the cumulative number of confirmed cases of COVID-19.

319

320

321

322

323

324

325

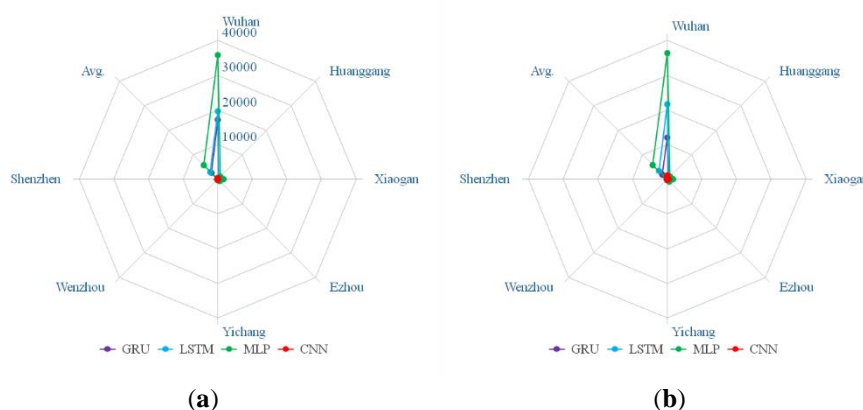

326

327 **Fig. 13.** MAE radar charts. (a) Six factors were adopted as the input layer. (b) Only one factor was adopted as the input  
328 layer.

329 Fig. 13 (a) and (b) presents the radar charts of MAE values for the comparison between the output results  
330 and real values for six and one factors, respectively. Regardless of whether one or six factors were used, the  
331 prediction results, in terms of MAE, of the proposed CNN model were superior to those of its counterparts. For  
332 the proposed CNN model, the use of six factors yielded better prediction results, in terms of MAE, in  
333 comparison to the use of only one factor, particularly for Wuhan City.

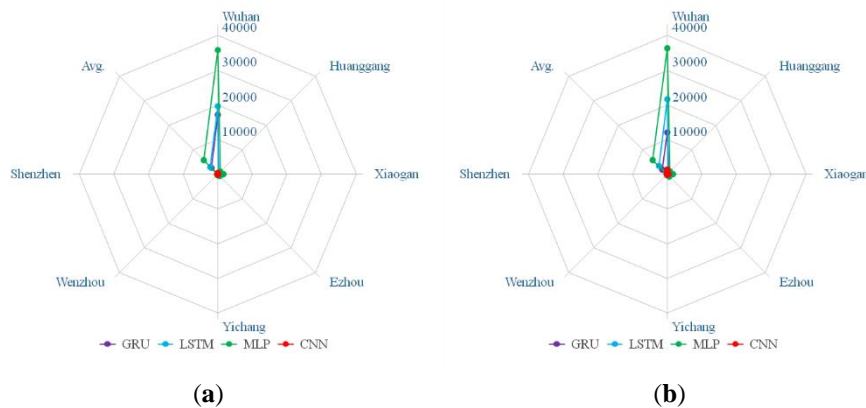

334 **Fig. 14.** RMSE radar charts. (a) Six pieces of important information were adopted as the input layer. (b) Only one piece of  
335 information was adopted as the input layer.  
336

337 Fig. 14 (a) and (b) presents the radar charts of RMSE values for the comparison between the output results  
338 and real values for six and one factors, respectively. The results further demonstrated the excellent predictive  
339 performance of the proposed CNN model for the cumulative number of confirmed cases of COVID-19, making  
340 the model a valuable reference for other countries in their establishment of country-specific COVID-19  
341 prediction models. In general, the prediction performances of the models from most favorable to least favorable  
342 were those for CNN, GRU, LSTM, and MLP.

### 343 5. Conclusions

344 A novel and multi-input CNN deep neural network model was proposed in this study to predict the  
345 cumulative number of confirmed cases of COVID-19. The cumulative number of confirmed cases in the next  
346 day is predicted according to the previous five days' total number of confirmed cases, total confirmed new cases,  
347 total cured cases, total cured new cases, total deaths, and total new deaths. In the experiment, the datasets of  
348 those seven Chinese cities with severe confirmed cases—from Hubei Province, Guangdong Province, and  
349 Zhejiang Province—were used for the models' training and prediction. Because the COVID-19 epidemic is  
350 ongoing, the algorithm proposed in this study can rapidly use small datasets to establish models with high  
351 predictive accuracy, different from many other studies. In addition, with the algorithm, a deep learning network  
352 prediction model for the number of confirmed cases of COVID-19 was established, and the verification and  
353 comparison were conducted among different deep learning algorithms. The accuracy and reliability of the deep  
354 learning algorithm were verified by having it predict the future trend of COVID-19. Furthermore, experiments  
355 for multiple cities with more severe confirmed cases in China indicated that the prediction model of this study  
356 had the lowest error rate among its counterparts tested. However, at the time of writing, countries other than  
357 China have had COVID-19 outbreaks, such as Italy, South Korea, Iran, Spain, France, and Germany. In the  
358 future, the establishment of more complete databases will lead to improvements to the proposed prediction  
359 model. For example, deep learning networks with a mixed structure can be introduced to establish more accurate  
360 models, which can be applied to more countries. The predicted trends can aid the containment of the COVID-  
361 19 epidemic and extend the scope of application of artificial intelligence.  
362

### 363 References

364 1. Zhu, N.; Zhang, D.; Wang, W.; Li, X.; Yang, B.; Song, J.; Zhao, X.; Huang, B.; Shi, W.; Lu, R.; Niu, P.;  
365 Zhan, F.; Ma, X.; Wang, D.; Xu, W.; Wu, G.; Gao, G. F.; Tan, W.; China Novel Coronavirus, I.; Research,

- 366 T., A Novel Coronavirus from Patients with Pneumonia in China, 2019. *N Engl J Med* **2020**, *382*, (8), 727-  
367 733.
- 368 2. Locations with Confirmed COVID-19 Cases Global Map Available online:  
369 <https://www.cdc.gov/coronavirus/2019-ncov/locations-confirmed-cases.html>.
- 370 3. Roosa, K.; Lee, Y.; Luo, R.; Kirpich, A.; Rothenberg, R.; Hyman, J. M.; Yan, P.; Chowell, G., Short-term  
371 Forecasts of the COVID-19 Epidemic in Guangdong and Zhejiang, China: February 13-23, 2020. *J Clin*  
372 *Med* **2020**, *9*, (2).
- 373 4. Z. Liu, P. M., O. Seydi, G. Webb, Predicting the cumulative number of cases for the COVID-19 epidemic  
374 in China from early data. **2020**.
- 375 5. Boldog, P.; Tekeli, T.; Vizi, Z.; Dénes, A.; Bartha, F. A.; Röst, G., Risk Assessment of Novel Coronavirus  
376 COVID-19 Outbreaks Outside China. *Journal of Clinical Medicine* **2020**, *9*, (2).
- 377 6. Al-Qaness, M. A. A.; Ewees, A. A.; Fan, H.; Abd El Aziz, M., Optimization Method for Forecasting  
378 Confirmed Cases of COVID-19 in China. *J Clin Med* **2020**, *9*, (3).
- 379 7. Jung, S.-m.; Akhmetzhanov, A. R.; Hayashi, K.; Linton, N. M.; Yang, Y.; Yuan, B.; Kobayashi, T.;  
380 Kinoshita, R.; Nishiura, H., Real-Time Estimation of the Risk of Death from Novel Coronavirus  
381 (COVID-19) Infection: Inference Using Exported Cases. *Journal of Clinical Medicine* **2020**, *9*, (2).
- 382 8. Fan, C.; Liu, L.; Guo, W.; Yang, A.; Ye, C.; Jilili, M.; Ren, M.; Xu, P.; Long, H.; Wang, Y., Prediction of  
383 Epidemic Spread of the 2019 Novel Coronavirus Driven by Spring Festival Transportation in China: A  
384 Population-Based Study. *Int J Environ Res Public Health* **2020**, *17*, (5).
- 385 9. Yang, W.; Cao, Q.; Qin, L.; Wang, X.; Cheng, Z.; Pan, A.; Dai, J.; Sun, Q.; Zhao, F.; Qu, J.; Yan, F., Clinical  
386 characteristics and imaging manifestations of the 2019 novel coronavirus disease (COVID-19): A multi-  
387 center study in Wenzhou city, Zhejiang, China. *J Infect* **2020**.
- 388 10. Zixin Hu , Q. G., Shudi Li , Li Jin and Momiao Xiong Artificial Intelligence Forecasting of Covid-19 in  
389 China.
- 390 11. Guo, Q.; Li, M.; Wang, C.; Wang, P.; Fang, Z.; tan, J.; Wu, S.; Xiao, Y.; Zhu, H., Host and infectivity  
391 prediction of Wuhan 2019 novel coronavirus using deep learning algorithm. **2020**.
- 392 12. Metsky, H. C.; Freije, C. A.; Kosoko-Thoroddsen, T.-S. F.; Sabeti, P. C.; Myhrvold, C., CRISPR-based  
393 surveillance for COVID-19 using genomically-comprehensive machine learning design. **2020**.
- 394 13. Riou, J.; Althaus, C. L., PATTERN OF EARLY HUMAN-TO-HUMAN TRANSMISSION OF WUHAN  
395 2019- NCOV. **2020**.
- 396 14. Liu, T.; Hu, J.; Xiao, J.; He, G.; Kang, M.; Rong, Z.; Lin, L.; Zhong, H.; Huang, Q.; Deng, A.; Zeng, W.;  
397 Tan, X.; Zeng, S.; Zhu, Z.; Li, J.; Gong, D.; Wan, D.; Chen, S.; Guo, L.; Li, Y.; Sun, L.; Liang, W.; Song, T.;  
398 He, J.; Ma, W., Time-varying transmission dynamics of Novel Coronavirus Pneumonia in China. **2020**.
- 399 15. Ming, W.-K.; Huang, J.; Zhang, C. J. P., Breaking down of healthcare system: Mathematical modelling  
400 for controlling the novel coronavirus (2019-nCoV) outbreak in Wuhan, China. **2020**.
- 401 16. Zhao, N.; Wang, J.; Yu, Y.; Zhao, J.-Y.; Chen, D.-B., Spreading predictability in complex networks. **2020**.
- 402 17. Fountain-Jones, N.; Machado, G.; Carver, S.; Packer, C.; Mendoza, M.; Craft, M. E., How to make more  
403 from exposure data? An integrated machine 1 learning pipeline to predict pathogen exposure **2019**.
- 404 18. Benvenuto, D.; Giovanetti, M.; Vassallo, L.; Angeletti, S.; Ciccozzi, M., Application of the ARIMA model  
405 on the COVID-2019 epidemic dataset. *Data in Brief* **2020**, *29*.
- 406 19. Li, Q.; Feng, W.; Quan, Y. H., Trend and forecasting of the COVID-19 outbreak in China. *J Infect* **2020**.

- 407 20. Tian, S.; Hu, N.; Lou, J.; Chen, K.; Kang, X.; Xiang, Z.; Chen, H.; Wang, D.; Liu, N.; Liu, D.; Chen, G.;  
408 Zhang, Y.; Li, D.; Li, J.; Lian, H.; Niu, S.; Zhang, L.; Zhang, J., Characteristics of COVID-19 infection in  
409 Beijing. *J Infect* **2020**.
- 410 21. Chen, H.; Guo, J.; Wang, C.; Luo, F.; Yu, X.; Zhang, W.; Li, J.; Zhao, D.; Xu, D.; Gong, Q.; Liao, J.; Yang,  
411 H.; Hou, W.; Zhang, Y., Clinical characteristics and intrauterine vertical transmission potential of  
412 COVID-19 infection in nine pregnant women: a retrospective review of medical records. *The Lancet* **2020**,  
413 395, (10226), 809-815.
- 414 22. Pham, T. A.; Ly, H.-B.; Tran, V. Q.; Giap, L. V.; Vu, H.-L. T.; Duong, H.-A. T., Prediction of Pile Axial  
415 Bearing Capacity Using Artificial Neural Network and Random Forest. *Applied Sciences* **2020**, *10*, (5).
- 416 23. Khalid, Z.; Abbas, G.; Awais, M.; Alquthami, T.; Rasheed, M. B., A Novel Load Scheduling  
417 Mechanism Using Artificial Neural Network Based Customer Profiles in Smart Grid. *Energies* **2020**, *13*,  
418 (5).
- 419 24. Wang, Y.; Li, Y.; Song, Y.; Rong, X., The Influence of the Activation Function in a Convolution Neural  
420 Network Model of Facial Expression Recognition. *Applied Sciences* **2020**, *10*, (5).
- 421 25. Bai, T.; Pang, Y.; Wang, J.; Han, K.; Luo, J.; Wang, H.; Lin, J.; Wu, J.; Zhang, H., An Optimized Faster R-  
422 CNN Method Based on DRNet and RoI Align for Building Detection in Remote Sensing Images. *Remote*  
423 *Sensing* **2020**, *12*, (5).
- 424 26. Abo-Tabik, M.; Costen, N.; Darby, J.; Benn, Y., Towards a Smart Smoking Cessation App: A 1D-CNN  
425 Model Predicting Smoking Events. *Sensors (Basel)* **2020**, *20*, (4).
- 426 27. Zhang, Q.; Gao, T.; Liu, X.; Zheng, Y., Public Environment Emotion Prediction Model Using LSTM  
427 Network. *Sustainability* **2020**, *12*, (4).
- 428 28. Zhang, M.; Geng, G.; Chen, J., Semi-Supervised Bidirectional Long Short-Term Memory and  
429 Conditional Random Fields Model for Named-Entity Recognition Using Embeddings from Language  
430 Models Representations. *Entropy* **2020**, *22*, (2).
- 431 29. Jin, X. B.; Yang, N. X.; Wang, X. Y.; Bai, Y. T.; Su, T. L.; Kong, J. L., Hybrid Deep Learning Predictor for  
432 Smart Agriculture Sensing Based on Empirical Mode Decomposition and Gated Recurrent Unit Group  
433 Model. *Sensors (Basel)* **2020**, *20*, (5).
- 434 30. Batur DİNler, Ö.; Aydin, N., An Optimal Feature Parameter Set Based on Gated Recurrent Unit  
435 Recurrent Neural Networks for Speech Segment Detection. *Applied Sciences* **2020**, *10*, (4).
- 436 31. Coronavirus disease (COVID-2019) situation reports:  
437 <http://www.who.int/emergencies/diseases/novel-coronavirus-2019/situation-reports>.

438
